# Supplementary material for: One-Year Research Experience for Associate’s Degree Students Impacts Graduation, STEM Retention, and Transfer Patterns
Source: Atypon-hosted journal article supplement (doi:10.1187/cbe.19-02-0042), 2019-05-31
Supplement: combinedsupmats.pdf [file combinedsupmats.pdf]

# Supplemental Material

*CBE—Life Sciences Education*

Nerio *et al.*

**TABLE S1** Total Enrollment at CUNY colleges, STEM Enrollment, and Number of CRSP Participants

| <b>CUNY College</b>                           | <b>Total Enrollment (Fall 2016)</b> | <b>STEM Enrollment (Fall 2016)</b> | <b>Number of CRSP Students (Y1,Y2,Y3)</b> |
|-----------------------------------------------|-------------------------------------|------------------------------------|-------------------------------------------|
| <b>Borough of Manhattan Community College</b> | 26,748                              | 17.8%                              | 65                                        |
| <b>Bronx Community College</b>                | 10,919                              | 13.1%                              | 45                                        |
| <b>College of Staten Island</b>               | 13,594                              | 23.2%                              | 55                                        |
| <b>Guttman Community College</b>              | 995                                 | 9.1%                               | 35                                        |
| <b>Hostos Community College</b>               | 7,210                               | 9.5%                               | 60                                        |
| <b>Kingsborough Community College</b>         | 15,968                              | 11.0%                              | 60                                        |
| <b>LaGuardia Community College</b>            | 19,456                              | 20.0%                              | 65                                        |
| <b>Medgar Evers College</b>                   | 6,819                               | 32.9%                              | 45                                        |
| <b>New York City College of Technology</b>    | 17,282                              | 45.3%                              | 65                                        |
| <b>Queensborough Community College</b>        | 15,569                              | 15.7%                              | 65                                        |

**CUNY RESEARCH SCHOLARS PROGRAM**  
**2018 STUDENT SURVEY**

To all CUNY Research Program Scholars Program students: We would like your feedback on how well the program worked for you. Please note that this survey is anonymous and voluntary. If you decide not to take the survey, it will have no impact on your participation in the program.

Your responses to this survey will help us continue to improve the program. Thank you!

## CRSP STUDENT SURVEY

**We hope you have had a constructive and enjoyable experience as a member of the CUNY Research Scholars Program. Please take a few minutes to complete this survey. It will help us understand how well the program served you. Your experiences will also help us as we continue to improve the program for future students. We will not collect your name.**

1. During the 2017-2018 academic year, where were you enrolled? (please circle the letter next to the corresponding college)
  - a. Borough of Manhattan Community College
  - b. Bronx Community College
  - c. College of Staten Island
  - d. Guttman Community College
  - e. Hostos Community College
  - f. Kingsborough Community College
  - g. LaGuardia Community College
  - h. Medgar Evers College
  - i. New York City College of Technology
  - j. Queensborough Community College
  
2. What was your major? \_\_\_\_\_
  
3. In what discipline was your CRSP project involved?
  - a. Physics
  - b. Chemistry
  - c. Biology
  - d. Engineering
  - e. Environmental Science
  - f. Mathematics
  - g. Social Sciences
  - h. Other
  
4. Which one of the following best describes your participation in CRSP (please circle one)
  - a. This was my first year in the program
  - b. This was my second year in the program
  
5. Approximately how many credits did you have before you joined the CUNY Research Scholars Program (please circle one)
  - a. Less than 30
  - b. Between 31 and 45
  - c. More than 45

Questions 6 through 9 refer to your experiences in college before you enrolled in CRSP. Please circle a number between 1 and 5 to indicate how strongly you agree or disagree with the items below, with 1 meaning strongly disagree and 5 meaning strongly agree.

6. I felt a sense of belonging at my college before I became involved in the CUNY Research Scholars Program.

1                      2                      3                      4                      5

7. I felt as if my professors (one or more) genuinely cared about me.

1                      2                      3                      4                      5

8. I found myself wishing that I had more guidance or advising at my college.

1                      2                      3                      4                      5

9. The following made me feel at home, or as if I belonged, at my college before I became involved in CRSP (reminder: 1 means strongly disagree and 5 means strongly agree):

The general environment at my college:

1                      2                      3                      4                      5

My STEM courses (science and math):

1                      2                      3                      4                      5

My general coursework:

1                      2                      3                      4                      5

My professors:

1                      2                      3                      4                      5

10. Before I enrolled in CRSP, I enjoyed going to college.

1                      2                      3                      4                      5

11. Before I enrolled in CRSP, I had a sense of what it meant to conduct research.

1                      2                      3                      4                      5

12. At the time that I joined CRSP, I would have described myself as (please circle one)
- a. A student who comfortably excelled at most of my coursework. (if you choose this response, please skip question 10)
  - b. A student who performed well in most of my coursework but struggled with certain courses.
  - c. A student who was struggling with college coursework.
13. If you felt you were struggling with some of your coursework when you first became a CUNY Research Scholar, in which area(s) did you feel you could have used the most help? (circle all that apply)
- a. English/writing
  - b. Other liberal arts requirements
  - c. Mathematics
  - d. Courses in my chosen major
  - e. Other science courses not in my major

The remaining questions refer to your experience in college once you became involved in the CUNY Research Scholars Program. Please circle a number between 1 and 5 to indicate how strongly you agree or disagree with the items below with 1 meaning strongly disagree and 5 meaning strongly agree.

14. I felt a greater sense of belonging at my college than I did before becoming involved in the program.

1                      2                      3                      4                      5

15. Participation in CRSP led me to participate more in my classes.

1                      2                      3                      4                      5

16. I felt as if I were able to concentrate more on my coursework than I did before becoming involved in the program.

1                      2                      3                      4                      5

17. I felt as if my mentor cared about me as a person.

1                      2                      3                      4                      5

18. My mentor helped me develop my self-confidence (reminder: 1 means strongly disagree and 5 means strongly agree)

1                      2                      3                      4                      5

19. My mentor helped me develop my scientific (or social scientific) knowledge and skills.

1                      2                      3                      4                      5

20. My mentor helped me improve my writing skills.

1                      2                      3                      4                      5

21. My mentor helped me consider my next steps, after graduation from my associate degree program.

1                      2                      3                      4                      5

22. The hours required for my CRSP research sometimes made it more difficult to concentrate on my coursework.

1                      2                      3                      4                      5

23. The CRSP programming at my college was of high quality and helped me develop my skills as a researcher.

1                      2                      3                      4                      5

24. The CRSP programming at my college helped me develop my self-confidence

1                      2                      3                      4                      5

25. If you were employed at any point during the 2017-2018 year, please let us know how your outside work affected you (If you did not have a job, please skip this question)

- a. Working at my job(s) made it significantly more difficult to concentrate on my CRSP and classroom work
- b. Working at my job(s) made it a little more difficult to concentrate on my CRSP and classroom work
- c. Working at my job(s) did not have any impact on my CRSP and classroom work

26. If you were employed, please let us know about your working hours: (circle all that apply).

- a. I worked 15 hours or less per week during the academic year (fall/spring)
- b. I worked more than 15 hours per week during the academic year (fall/spring)
- c. I was not employed during the summer
- d. I worked 15 hours or less per week during the summer
- e. I worked more than 15 hours per week during the summer

27. How did you (or will you) use the CUNY Research Scholars funds? (please circle all that apply)

- a. The funds helped me pay my tuition.
- b. The funds helped me reduce the number of hours I worked at my outside job(s).
- c. I needed the funds to help pay rent.
- d. I needed the funds for household expenses other than rent.
- e. I used the funds for other expenses. Please describe \_\_\_\_\_

28. I would describe myself, at this time, as

- a. A student who is comfortably excelling at most of my coursework.
- b. A student who performs well in most of my coursework but struggles with certain courses.
- c. A student who was struggling with college coursework.

29. I feel prepared for my next steps, after completion of my associate degree (reminder: 1 means strongly disagree and 5 means strongly agree)

1                      2                      3                      4                      5

30. I would like to pursue a career that involves academic or scientific research.

1                      2                      3                      4                      5

31. I would recommend CRSP to other students at my college (please circle a number from 1 to 5, with 1 meaning strongly agree and 5 meaning "strongly disagree").

1                      2                      3                      4                      5



32. Please tell us what you like best about CRSP

33. Was there anything about the program you felt could be improved
